# Supplementary material
Source: PubMed Central journal article supplement (PMC2889051)
Supplement: 0913737107_pnas.0913737107_SI.pdf [file 0913737107_pnas.0913737107_SI.pdf]

# Supporting Information

Schneck et al. 10.1073/pnas.0913737107

## SI Text

**SI Materials and Methods. *z*-resolution of the X-ray fluorescence experiments.** As shown in Fig. 3A, the normalized  $K^+$  fluorescence signal from purified rough mutant lipopolysaccharides (LPS Re) monolayer on  $Ca^{2+}$ -free buffer can be well modeled with  $z_{\max} = 5 \text{ \AA}$ . If we assume  $z_{\max} = 20 \text{ \AA}$ , coinciding with a  $K^+$  concentration peak well outside the saccharide head group slab, the fit is significantly worse [see also mean square deviation (MSD) vs.  $z_{\max}$  plot in Fig. 3A]. This is illustrated in Fig. S1, where both model curves are plotted together with the experimental data points.

**LPS Re monolayer slab model parameters and fits from grazing-incidence X-ray scattering out of the specular plane (GIXOS) measurements.** Table S1 contains the best matching model parameters of LPS Re monolayers at a lateral pressure of  $\pi = 20 \text{ mN/m}$  on  $Ca^{2+}$ -free and  $Ca^{2+}$ -loaded buffer as obtained from least-square fits to the measured GIXOS signals.  $\rho$  and  $d$  denote the electron density and the thickness of each medium, whereas  $\sigma$  denotes the RMS roughness of each interface between two neighboring media. Fig. S2 shows the measured GIXOS signals and the modeled curves according to the best matching model parameters.

**Surface pH and surface  $pK_a$  of carboxyl groups at LPS Re monolayers.** Ref. 1 provides a relation between the surface pH value ( $pH_s$ ),

the bulk pH value, and the electric surface potential  $\psi$ :

$$pH_s = pH + \frac{e\psi}{\ln 10 \cdot k_B T}. \quad [S1]$$

In our experimental system,  $\psi = 128 \text{ mV}$  was roughly approximated in a Poisson–Boltzmann approach from the measured average charge per LPS Re molecule ( $Q_{\text{tot}} = -2.3 \text{ e}$ ), the average area per molecule ( $A = 166 \text{ \AA}^2$ ), and the bulk ion concentrations in  $Ca^{2+}$ -free buffer. With these values, Eq. S1 yields  $pH_s = 5.25$ .

Ref. 1 also provides a relation between the surface  $pK_a$  value, the electric surface potential  $\psi$  and the degree of dissociation  $f$  of surface-confined acids:

$$\log_{10} \frac{f}{1-f} = pH - pK_a + \frac{e\psi}{\ln 10 \cdot k_B T} = pH_s - pK_a. \quad [S2]$$

We applied Eq. S2 to the two carboxyl groups in LPS Re monolayers. Because the  $pK_a$  values of phosphate and amino groups are far from the experimental pH values (2), it is plausible that they are fully ionized. Thus,  $f$  was determined from  $Q_{\text{tot}}$ , from the charge of the two carboxyl groups at full dissociation ( $Q_c^{\max} = -2 \text{ e}$ ), and from the average charge per molecule at full dissociation ( $Q_{\text{tot}}^{\max} = -3.6 \text{ e}$ , ref. 3). This leads to the result  $f = (Q_{\text{tot}}^{\max} - Q_c^{\max} - Q_{\text{tot}})/2 = 0.35$ , and Eq. S2 yields a surface  $pK_a = 5.5$ .

1. Hu K, Bard AJ (1997) Use of atomic force microscopy for the study of surface acid-base properties of carboxylic acid-terminated self-assembled monolayers. *Langmuir* 13:5114–5119.
2. Lide DR (2009) *CRC Handbook of Chemistry and Physics* (CRC, Boca Raton), 90th Ed.

3. Hagge SO, Hammer MU, Wiese A, Seydel U, Gutschmann T (2006) Calcium adsorption and displacement: Characterization of lipid monolayers and their interaction with membrane-active peptides/proteins. *BMC Biochem* 7(15):1–13.

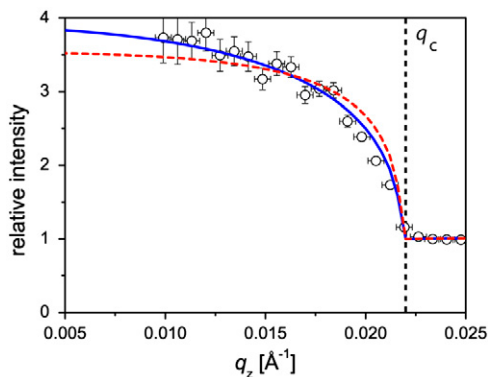

Fig. S1. Fit quality subject to different values of  $z_{\max}$ . Solid blue line:  $z_{\max} = 5 \text{ \AA}$ ; dashed red line:  $z_{\max} = 20 \text{ \AA}$ . Data:  $K^+$  fluorescence signal from LPS Re monolayer of  $Ca^{2+}$ -free buffer.

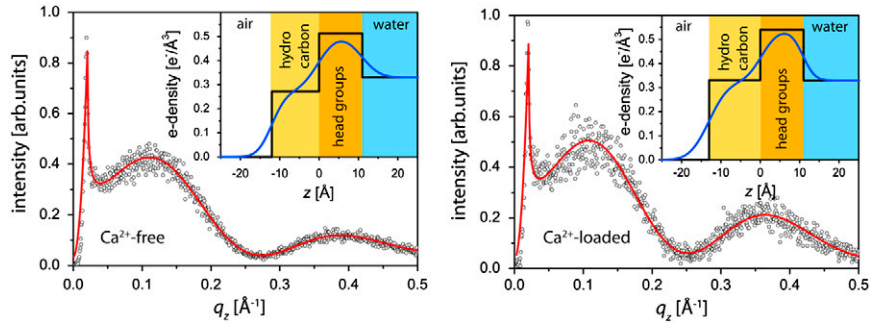

Fig. S2. Measured GIXOS signals (open circles) and best fits (solid lines) from LPS Re monolayers on Ca<sup>2+</sup>-free (Left) and Ca<sup>2+</sup>-loaded (Right) subphase at a lateral pressure of  $\pi = 20$  mN/m. (Inset): Electron density profiles (blue) and box models (black) corresponding to the best fitting parameters.

**Table S1. Electron density model parameters**

| Ca <sup>2+</sup> -loaded, 140 Å <sup>2</sup> | $\rho$ [e/Å <sup>3</sup> ] | $d$ [Å]  | $\sigma$ [Å] |
|----------------------------------------------|----------------------------|----------|--------------|
| Air                                          | 0.00                       | infinity | —            |
| Hydrocarbon chains                           | 0.33                       | 13       | 3.9          |
| Head group                                   | 0.54                       | 11       | 3.2          |
| Water                                        | 0.33                       | infinity | 2.4          |
| Ca <sup>2+</sup> -free, 166 Å <sup>2</sup>   | $\rho$ [e/Å <sup>3</sup> ] | $d$ [Å]  | $\sigma$ [Å] |
| Air                                          | 0.00                       | infinity | —            |
| Hydrocarbon chains                           | 0.27                       | 12       | 2.9          |
| Head group                                   | 0.51                       | 11       | 3.8          |
| Water                                        | 0.33                       | infinity | 3.6          |
